# Supplementary material for: Ginsenoside Rb1, Compound K and 20(S)-Protopanaxadiol Attenuate High-Fat Diet-Induced Hyperlipidemia in Rats via Modulation of Gut Microbiota and Bile Acid Metabolism
Source: MDPI journal article supplement (doi:10.3390/molecules29051108), 2024-03-01
Supplement: s1 [file s1]

**Supplementary Table S1.** Primers for RT-qPCR.

| <b>Genes</b>  | <b>Forward primer</b>  | <b>Reverse primer</b> |
|---------------|------------------------|-----------------------|
| PPAR $\alpha$ | TGAAAGATTCTGGAAACTGC   | TTCCTGCGAGTATGACCC    |
| PPAR $\gamma$ | TGGAGCCTAAGTTTGAGTT    | CAATCTGCCTGAGGTCTG    |
| ACC           | ACGCTATCATCAGTGCATA    | TGCGATAGTAGTCACGTAT   |
| FAS           | AAACCGACAACAACCTGCT    | TCTAAACCATGCCCTTCA    |
| HSL           | CGCCTTACGGAGTCTATGC    | GCTGTCTGATGGCTCTGAGTT |
| FXR           | TCATCCTCTCTCCAGACAGACA | AAATGCTGAGGGTTCTCGGG  |
| HMGCR         | CACAGAATGTGGGGAGTT     | GCTGAGGTAGAAGGTTGG    |
| CYP7A1        | GCTGGCTGAGGGATTGAA     | AAAGGTGGAGAGCGTGTC    |
| CYP7B1        | CATCATCTTGGCTTGCTC     | ATTCCAGGTCCTTTCTTT    |
| CYP27A1       | TTTCAAAGAACCCAGAGA     | CGTAGTGGCATAACACAA    |

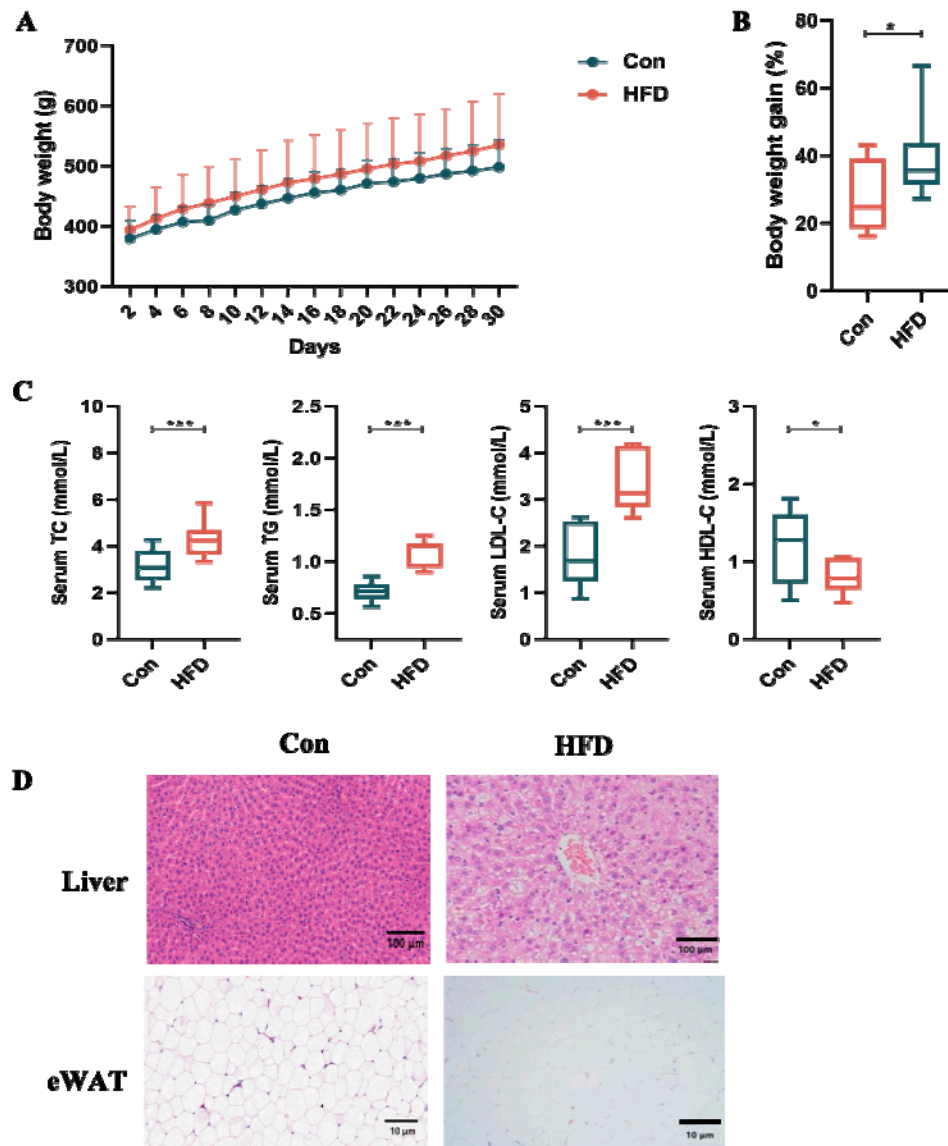

**Supplementary Figure S1.** The effect of high-fat diet intervention on SD rats. 20 SD rats were randomly divided into two groups, which were fed with a chow diet (1010086, n=10, Con group) and a high fat diet (XT19004, n=10, HFD group). These treatments lasted for 30 days. Compared with the Con group, HFD group could increase (A) Body weight, (B) Body weight gain, (C) Serum TC, TG, LDL-C and reduce HDL-C levels, (D) Histochemical staining showed that high-fat diet treatment led to hepatic steatosis and lipid accumulation in adipocytes. These results indicated that high-fat diet intervention could lead to lipid metabolism disorders in rats. Values are presented as mean  $\pm$  SEM. \* $p$ <0.05, \*\* $p$ <0.01 and \*\*\* $p$ <0.001 versus HFD group.

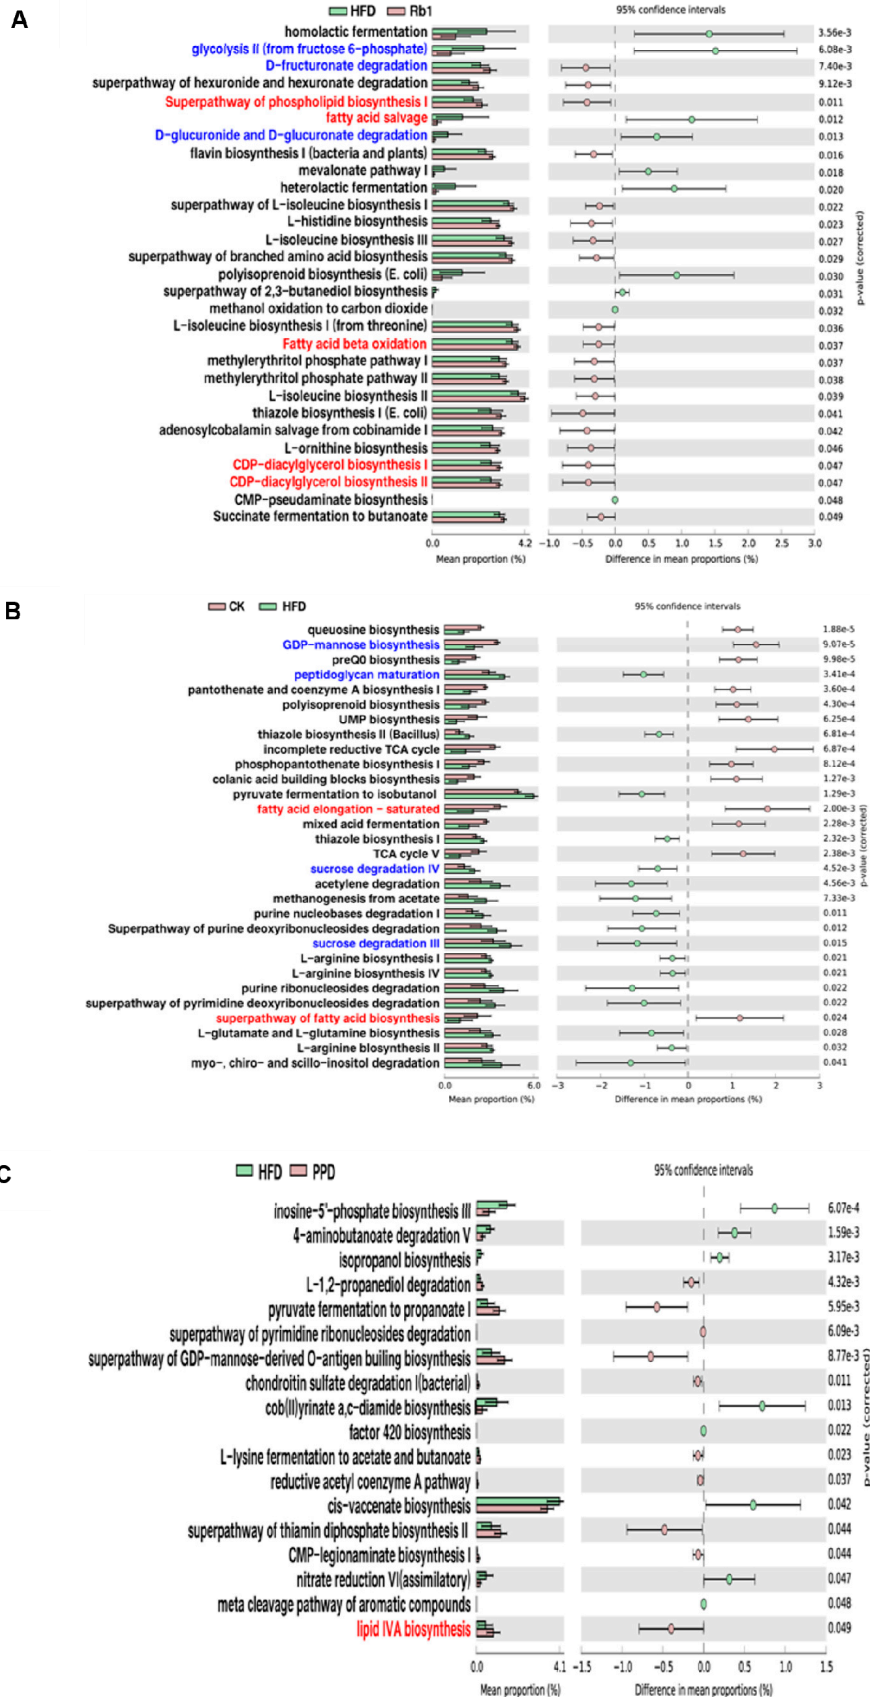

**Figure S2.** Function prediction in HFD-fed rats after ginsenoside Rb1, CK and PPD treatment. Prediction of the function of microbial genes involved in metabolism by PICRUST analysis and based on the Welch's t-test ( $p < 0.05$ ), the colored circles represent the 95% confidence intervals calculated by Welch's inverted method, (A) Rb1 vs. HFD, (B) CK vs. HFD, (C) PPD vs. HFD.
